## CORRESPONDENCE

## References

1. McLellan MF, Case LD, Barnett MC: Trust, but verify: The accuracy of references in four anesthesia journals. *ANESTHESIOLOGY* 77:185-188, 1992
2. Biebuyck JF: Concerning the ethics and accuracy of scientific citations. *ANESTHESIOLOGY* 77:1-2, 1992
3. Bailey JM, Levy JH, Rogers G, Szlam F, Hug CC: Amrinone in patients undergoing cardiac surgery (reply). *ANESTHESIOLOGY* 77:215-216, 1992
4. Lathi KG: Amrinone in patients undergoing cardiac surgery (letter). *ANESTHESIOLOGY* 77:215, 1992
5. Butterworth JF IV, Royster RL, Robertie PG, Zaloga GP, Prielipp RC, Dudas LM: Hemodynamic effects of amrinone in patients recovering from aortocoronary bypass surgery (abstr). *Anesth Analg* 70:345, 1990

6. Lock S, Smith J: What do peer reviewers do? *JAMA* 263:1341-1343, 1990

7. Eichorn P, Yankauer A: Do authors check their references? A survey of accuracy of references in three public health journals. *Am J Public Health* 77:1011-1012, 1987

(Accepted for publication December 3, 1992.)

**Editorial Note:**—Dr. Shulman and Ms. Robillard provide a useful and easily accomplished suggestion to reduce the frequency of bibliographic citation errors in papers published in *ANESTHESIOLOGY*. Accordingly, we shall include a version of the above quoted paragraph as a part of each letter to authors of papers for which a revision is requested.

**Lawrence J. Saidman, M.D.**  
Editor in Chief

Anesthesiology  
78:617, 1993  
© 1993 American Society of Anesthesiologists, Inc.  
J. B. Lippincott Company, Philadelphia

## Halothane and the Guanylate Cyclase System

**To the Editor:**—Eskinder *et al.*<sup>1</sup> recently demonstrated that halothane stimulates particulate guanylate cyclase activity and increases tissue cyclic guanosine 3,5-monophosphate (cGMP) level in vascular smooth muscle of canine cerebral artery. It is a valuable contribution to the understanding of the mechanisms that underlie cerebral vasodilator effect of halothane. However, their description that the direct effect of halothane on vascular smooth muscle tissue cGMP levels had not been reported before their study is not correct.

We have previously reported that halothane increases cGMP content of endothelium-denuded aorta of the rat.<sup>2</sup> However, cGMP content of aorta with intact endothelium was rather decreased by halothane.<sup>3</sup> A possible explanation for these observations is that halothane decreased basal production of endothelium-derived relaxing factor (EDRF), and thereby decreased endothelium-dependent cGMP formation, while increasing endothelium-independent cGMP. These results with rat aorta suggested that the stimulating effect of halothane on guanylate cyclase does not play a significant role in the vasodilator effect of halothane in physiologic conditions.

It is a common observation that cerebral artery is more susceptible to the dilator effect of halothane than are extracerebral arteries such as rat aorta. The finding of Eskinder *et al.* that cGMP level of cerebral artery with intact endothelium was increased by halothane, in contrast to our finding in rat aorta, is consistent with the high susceptibility of cerebral artery to halothane's dilator effect. However, their finding does not necessarily support the hypotheses that stimulating effect of halothane on guanylate cyclase differs in cerebral and extracerebral arteries, because we cannot deny the possibility that the effect of halothane on endothelium (*i.e.*, basal level of EDRF or potential of halothane to reduce it) differs in cerebral and extracerebral arteries.

**Kumi Nakamura, M.D.**  
Instructor in Anesthesia

**Hiroshi Toda, M.D.**  
Fellow in Anesthesia

Department of Anesthesiology  
Kyoto University Hospital  
Sakyo-ku, Kyoto 606-01, Japan

**Yoshio Hatano, M.D.**  
Professor of Anesthesiology  
Department of Anesthesiology  
Wakayama Medical College  
Wakayama 640, Japan

## References

1. Eskinder H, Hillard CJ, Flynn N, Bosnjak ZJ, Kampine JP: Role of guanylate cyclase-cGMP system in halothane-induced vasodilatation in canine cerebral arteries. *ANESTHESIOLOGY* 77:482-487, 1992
2. Nakamura K, Hatano Y, Toda H, Nishiwada M, Baek WY, Mori K: Halothane-induced relaxation of vascular smooth muscle: A possible contribution of increased cyclic GMP formation. *Jpn J Pharmacol* 55:165-168, 1991
3. Toda H, Nakamura K, Hatano Y, Kakuyama M, Nishiwada M, Mori K: Halothane and isoflurane inhibit endothelium-dependent relaxation elicited by acetylcholine. *Anesth Analg* 75:198-203, 1992

(Accepted for publication December 7, 1992.)
